# Supplementary material for: Developing co-management for conservation and local development in China’s national parks: findings from focus group discussions in the Sanjiangyuan Region
Source: Frontiers journal article supplement (doi:10.3389/fcosc.2023.903788), 2023-08-10
Supplement: Table_1.docx [file Table_1.docx]

**Table S1.** Timeline of major environmental disasters and policy events that have affected China since 1994

| **Year** | **Major environmental events in China** | **National policies impacting the Sanjiangyuan region** | **Provincial policies for Sanjiangyuan** | **Source** |
| --- | --- | --- | --- | --- |
| 1997 | Severe drought in Yellow River Basin |  |  | (Wang et al., 2018) |
| 1998 | Floods in Yangtze River Basin | Natural Forest Conservation Program (on-going) |  | (Yin & Li, 2001) |
| 1999 |  | Sloping Lands Conversion Program (on-going) |  | (Bryan et al., 2018) |
| 2000 |  | Western Development Strategy began (on-going) | Sanjiangyuan Nature Reserve (provincial reserve) | (Li et al., 2012) |
|  | Ecological resettlement (shengtai yimin) policy |  | (Ptackova, 2011; 2017)  (Sternfeld, 2017) |
| 2001 |  | Wildlife Conservation and Nature Protection Program (on-going)  Forest Ecosystem Compensation Fund (on-going) |  | (Xi et al., 2014)  (Deng et al., 2011) |
| 2003 |  | State Council approved promotion of Sanjiangyuan Nature Reserve to a National Nature Reserve  ‘Converting pasturelands into grasslands’ (tuimu huancao), temporary grazing ban also being advanced in relation to ‘converting pasturelands into forests’ (tuimu huanlin) |  | (Yeh, 2005)  (Sternfeld, 2017)  (Ptackova, 2017) |
| 2005 |  | State Council approved implementation of “Overall Plan for Ecological Protection and Construction of Qinghai Sanjiangyuan Nature Reserve”.  State Council established requirements for Phase I of the Sanjiangyuan National Ecological Protection Comprehensive Experimental Zone. |  | (Ptackova, 2011) |
| 2008 | Earthquake in Wenchuan, Sichuan |  |  | (Yang et al., 2011) |
| 2010 | Earthquake in Yushu, Qinghai  Plan for restoration and rebuilding after Yushu earthquake approved. |  | Qinghai Provincial Government issued "Several Opinions on Exploring the Establishment of Sanjiangyuan Ecological Compensation Mechanism" | (Zhang et al.,2010)  (Sun et al., 2019)  (Xu & Lu, 2013) |
| 2011 |  | Grassland Ecological Protection Program (on-going) |  | (The Central People’s Government of the People’s Republic of China, 2011) |
| 2012 |  |  | Qinghai “Ranger program”  officially started | (Qi & Chen, 2020) |
| 2014 |  | Qinghai Sanjiangyuan National Ecological Protection Comprehensive Experimental Zone Construction and Sanjiangyuan Ecological Protection and Construction Phase II launched. | Several Opinions of the Qinghai Provincial People's Government on Exploring the Establishment of Sanjiangyuan Ecological Compensation Mechanism  Implementation Opinions on the Grassland Ecological Protection Subsidy and Reward Mechanism in Qinghai Province (Trial) | (China News Network, 2018)  (Qinghai Provincial Government Office, 2014) |
| 2015 |  | State Council promulgates construction of “Ecological Civilization.” | Provincial-level ecological civilization construction legislation in Qinghai officially implemented.  Study on Water Ecological Compensation Mechanism and Policy in Sanjiangyuan District" passed review of the Ministry of Water Resources  The provincial government issued the "Opinions on the Establishment and Management of Public Welfare Positions for community wardens in the Sanjiangyuan National Ecological Protection Comprehensive Experimental Zone" | (Xinhua News Agency, 2015)  (Qinghai Daily, 2017)  (Wang et al., 2021)  (Foggin, 2021) |
| 2016 |  | Sanjiangyuan National Park Administration officially listed  “Ecological Red Lines” (ECR) officially launch |  | (Ma et al., 2021)  (Chinese Society For Environmental Sciences, 2018) |
| 2017 | Earthquake in Jiuzhaigou, Sichuan |  | "Sanjiangyuan National Parks Regulations (Trial)" implemented | (Lei et al., 2018) |
| 2021 |  | Launch of China’s new national park system |  | (Ma et al., 2021) |

References

1.Wang, F., Wang, Z., Yang, H., & Zhao, Y. Study of the temporal and spatial patterns of drought in the Yellow River basin based on SPEI. Science China Earth Sciences, 61, 1098-1111 (2018).

2.Yin, H., & Li, C. Human impact on floods and flood disasters on the Yangtze River. Geomorphology, 41(2-3), 105-109 (2001).

3.Bryan, B. A., Gao, L., Ye, Y., Sun, X., Connor, J. D., Crossman, N. D. et al. China’s response to a national land-system sustainability emergency. Nature, 559(7713), 193-204 (2018).

4.Li, W., Liu, Y. J., & Yang, Z. Preliminary strategic environmental assessment of the Great Western Development Strategy: safeguarding ecological security for a new western China. Environmental management, 49(2), 483-501(2012).

5.Ptackova, J. Sedentarisation of Tibetan nomads in China: Implementation of the Nomadic settlement project in the Tibetan Amdo area; Qinghai and Sichuan Provinces. Pastoralism: Research, Policy and Practice, 1(1), 1-11(2011).

6.Ptackova, J. Orchestrated Environmental Migration in Western China. In Routledge Handbook of Environmental Policy in China, 223-236(2017). Routledge.

7.Sternfeld, E. Routledge Handbook of Environmental Policy in China(2017). Taylor & Francis.

8.Xi, W., Wang, F., Shi, P., Dai, E., Anoruo, A. O., Bi, H. et al. Challenges to sustainable development in China: a review of six large-scale forest restoration and land conservation programs. Journal of sustainable forestry, 33(5), 435-453 (2014).

9.Deng, H., Zheng, P., Liu, T., & Liu, X. Forest ecosystem services and eco-compensation mechanisms in China. Environmental management, 48(6), 1079-1085 (2011).

10.Yeh, E. T. Green governmentality and pastoralism in western China:'converting pastures to grasslands'. Nomadic peoples, 9(1-2), 9-30 (2005).

11.Ptackova, J. Sedentarisation of Tibetan nomads in China: Implementation of the Nomadic settlement project in the Tibetan Amdo area; Qinghai and Sichuan Provinces. Pastoralism: Research, Policy and Practice, 1(1), 1-11(2011).

12.Yang, W., Wang, D., & Chen, G. Reconstruction strategies after the Wenchuan earthquake in Sichuan, China. Tourism Management, 32(4), 949-956 (2011).

13.Zhang, Y., Xu, L., & Chen, Y. T. Source process of the 2010 Yushu, Qinghai, earthquake. Science China Earth Sciences, 53(9), 1249-1251(2010).

14.Sun, L., Su, G., Tian, Q., Qi, W., Liu, F., Qi, M. et al. Religious belief and Tibetans’ response to earthquake disaster: a case study of the 2010 Ms 7.1 Yushu earthquake, Qinghai Province, China. Natural Hazards, 99, 141-159 (2019).

15.Xu, J., & Lu, Y. A comparative study on the national counterpart aid model for post-disaster recovery and reconstruction: 2008 Wenchuan earthquake as a case (2013). Disaster prevention and management.

16.The Central People’s Government of the People’s Republic of China. Available online: <http://www.gov.cn/gzdt/2011-09/29/content_1959759.htm> (accessed on 13 October 2021).

17.Qi J.Y., Chen X.L. Resettlement and adaptation of ecological migrants in the Three Rivers Headwaters Region. Ethnic studies, (4), 74-86 (2020). (in Chinese)

18.China News Network (2018). “Several Opinions of the Qinghai Provincial People's Government on Exploring the Establishment of Sanjiangyuan Ecological Compensation Mechanism”. Available at: <http://124.205.185.62:8080/main/146/20180207/1074369.html>.

19.Qinghai Provincial Government Office (2014). “Implementation Opinions on the Grassland Ecological Protection Subsidy and Reward Mechanism in Qinghai Province (Trial)”. Available at: <http://www.qh.gov.cn/ztzl/system/2014/10/24/010138566.shtml>.

20.Xinhua News Agency (2015). “Provincial-level ecological civilization construction legislation in Qinghai officially implemented”. Available at: <http://www.gov.cn/guowuyuan/2015-09/21/content_2936327.htm>.

21.Qinghai Daily. (2017). “Study on Water Ecological Compensation Mechanism and Policy in Sanjiangyuan District" passed review of the Ministry of Water Resources”. Available at: <http://www.qh.gov.cn/dmqh/system/2017/07/12/010272766.shtml>.

22.Wang, Y., Yang, H., Qi, D., Songer, M., Bai, W., Zhou, C. et al. Efcacy and management challenges of the zoning designations of China’s national parks. Biological Conservation, 254, 108962 (2021).

23.Foggin, J.M. We still need the wisdom of Ubuntu for successful nature conservation. Ambio 50, 723–725 (2021). <https://doi-org.ezproxy.library.ubc.ca/10.1007/s13280-020-01402-z>

24.Ting, M., Qingwen, M., Kun, X., & Weiguo, S. Resident willingness to pay for ecotourism resources and associated factors in Sanjiangyuan National Park, China. Journal of Resources and Ecology, 12(5), 693-706 (2021).

25.Chinese Society For Environmental Sciences (2018). “Ecological Red Lines (ECR) officially launch”. Available at: <http://www.chinacses.org/hjkp_23038/hbkpxw/201811/t20181127_675124.shtml>.

26.Lei, H., Wang, X., Hou, H., Su, L., Yu, D., & Wang, H. The earthquake in Jiuzhaigou County of Northern Sichuan, China on August 8, 2017. Natural hazards, 90, 1021-1030 (2018).
